# Supplementary material for: Enhanced interaction between Ru nanoparticles and N, C-modified mesoporous TiO2for efficient electrocatalytic hydrogen evolution at all pH values
Source: Royal Society of Chemistry journal article supplement (doi:10.1039/d2ta06390e), 2022-01-01
Supplement: d2ta06390e1.pdf [file d2ta06390e1.pdf]

Supporting Information for

**Enhanced interaction between Ru nanoparticles and N, C-modified mesoporous TiO<sub>2</sub> for efficient electrocatalytic hydrogen evolution at All pH Values**

Wei Xu,<sup>ab</sup> Huijie Xie,<sup>ad</sup> Fuyuan Cao,<sup>b</sup> Saisai Ran,<sup>ad</sup> Yuanhao Duan,<sup>ad</sup> Bin Li<sup>\*ab</sup> and Lei Wang<sup>\*ac</sup>

<sup>a</sup>State Key Laboratory Base of Eco-Chemical Engineering, International Science and Technology Cooperation Base of Eco-chemical Engineering and Green Manufacturing, Qingdao University of Science and Technology, Qingdao 266042, P. R. China. Correspondence and requests for materials should be addressed to B.L. (e-mail: binli@qust.edu.cn) and L.W. (e-mail: inorchemwl@126.com)

<sup>b</sup>College of Materials Science and Engineering, Qingdao University of Science and Technology, Qingdao 266042, China.

<sup>c</sup>College of Environment and Safety Engineering, Qingdao University of Science and Technology, Qingdao, Shandong 266042, China.

<sup>d</sup>College of Chemistry and Molecular Engineering, Qingdao University of Science and Technology.

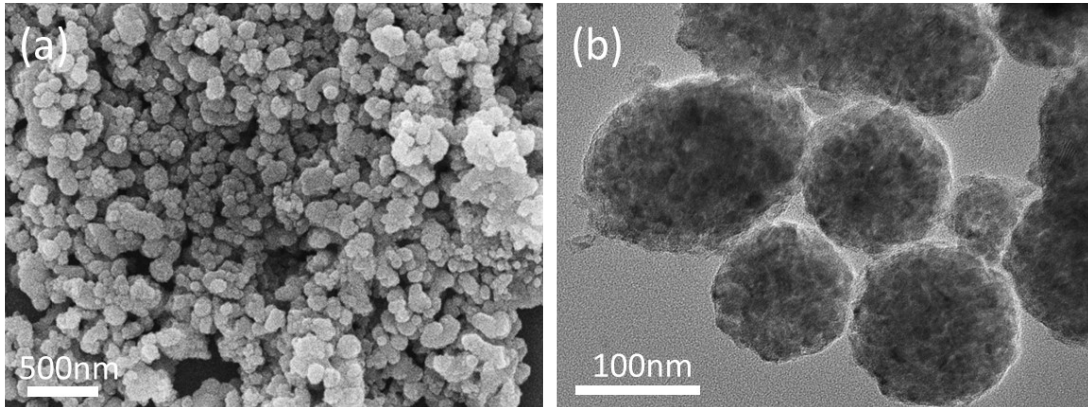

**Fig. S1.** (a) SEM and (b) TEM images of N-TiO<sub>2</sub>/C nanospheres.

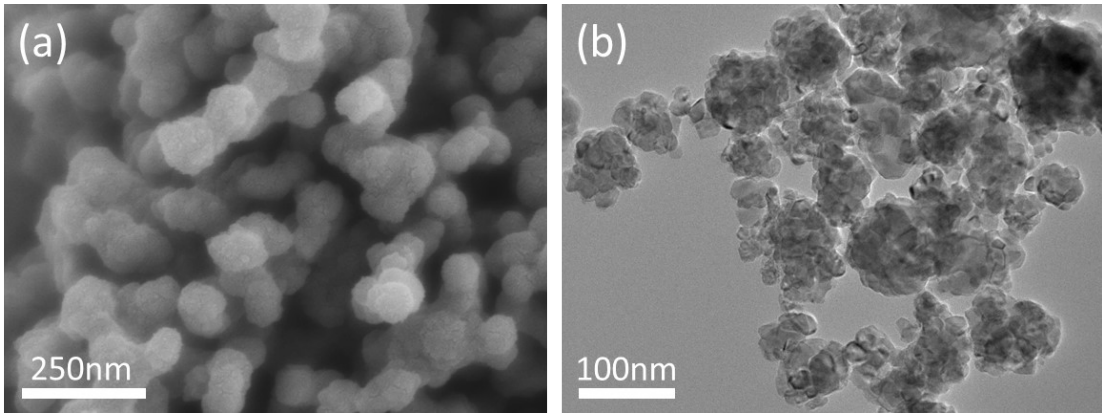

**Fig. S2.** (a) SEM and (b) TEM images of TiO<sub>2</sub> nanospheres.

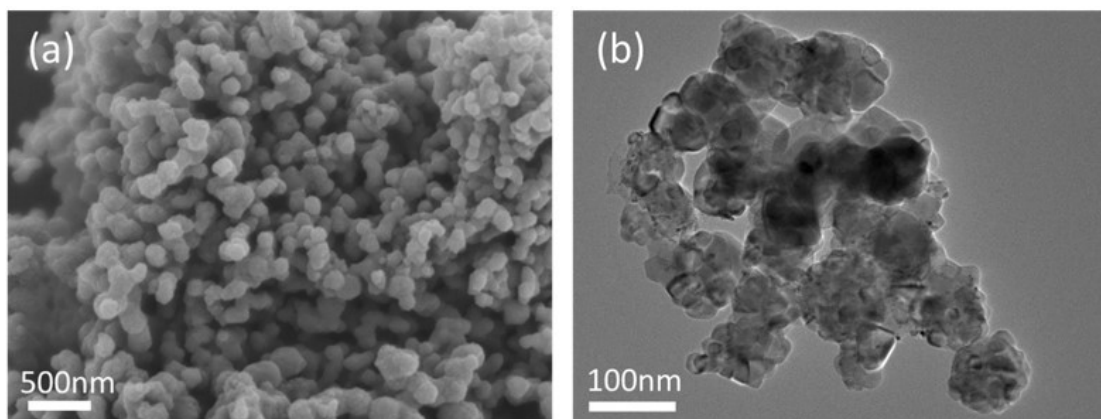

**Fig. S3.** (a) SEM and (b) TEM images of Ru@TiO<sub>2</sub> nanospheres.

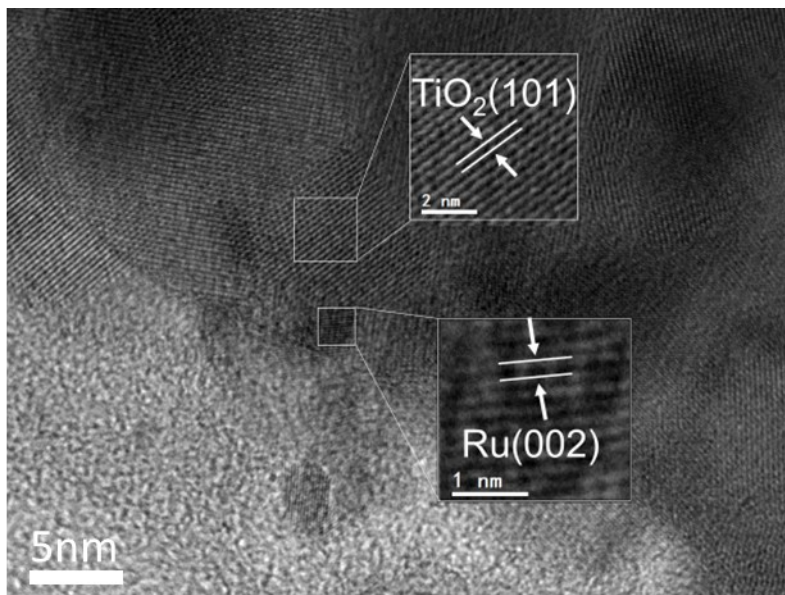

**Fig. S4.** HRTEM images of Ru@TiO<sub>2</sub> nanospheres.

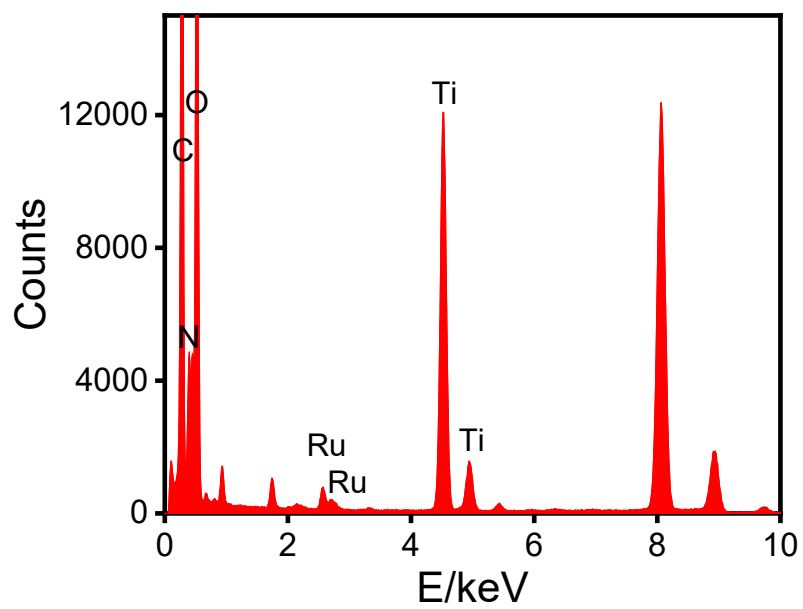

**Fig. S5.** The energy dispersive X-ray spectroscopy of Ru@N-TiO<sub>2</sub>/C.

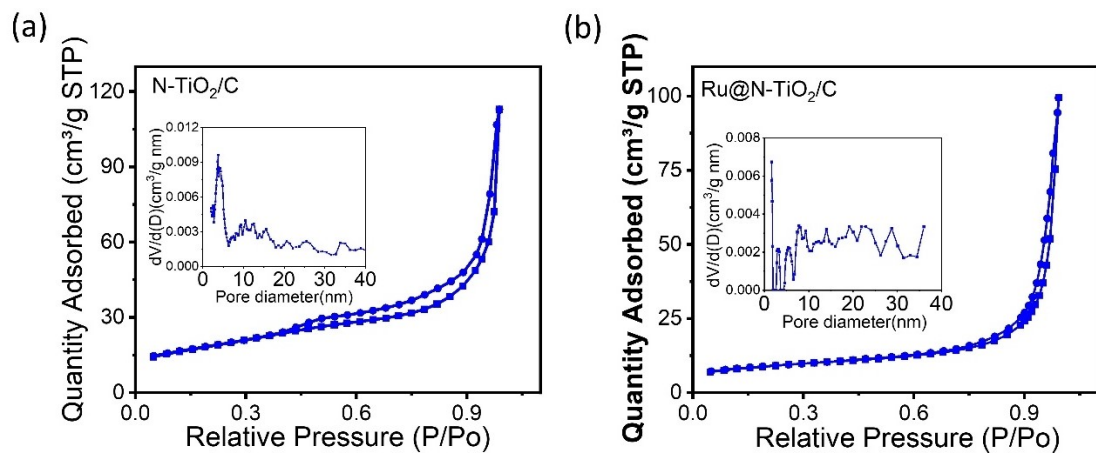

**Fig. S6.** Nitrogen adsorption/desorption isotherms of (a) N-TiO<sub>2</sub>/C, (b) Ru@N-TiO<sub>2</sub>/C composites.

insert: pore size distribution of N-TiO<sub>2</sub>/C and Ru@N-TiO<sub>2</sub>/C composites.

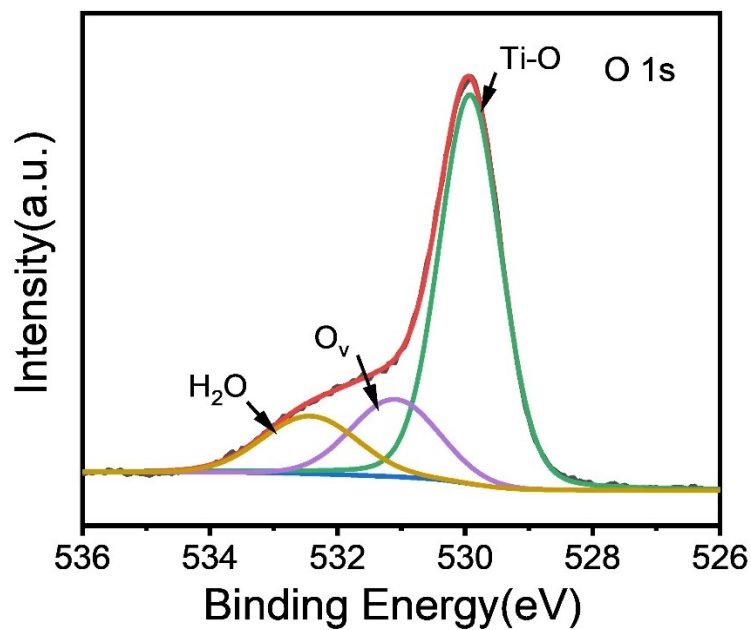

**Fig. S7.** High-resolution O 1s XPS spectra of Ru@N-TiO<sub>2</sub>/C composites.

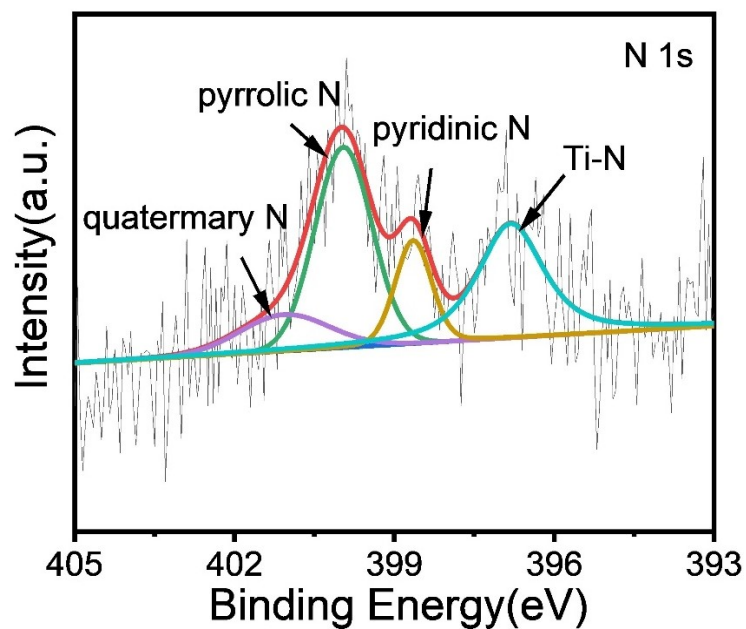

**Fig. S8.** High-resolution N 1s XPS spectra of Ru@N-TiO<sub>2</sub>/C composites.



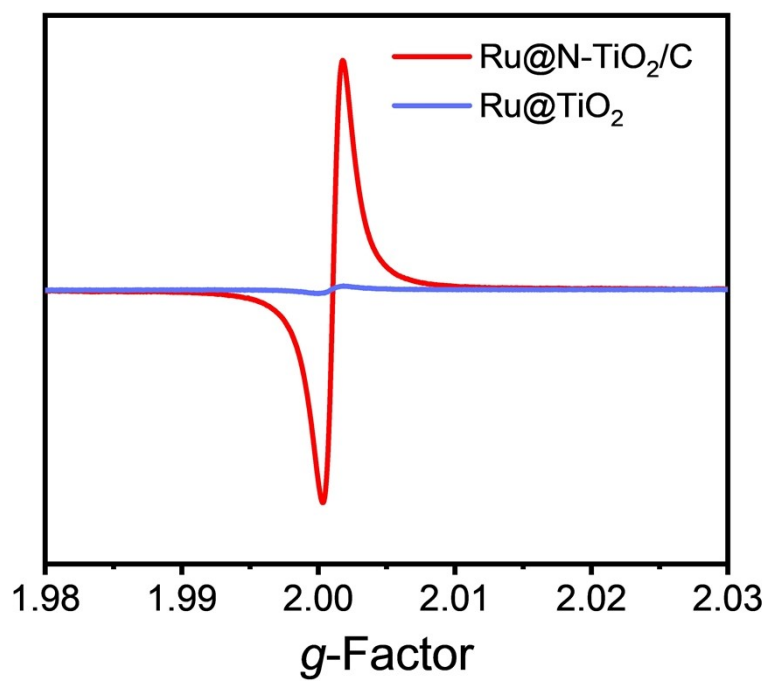

**Fig. S9.** EPR spectra of Ru@N-TiO<sub>2</sub>/C and Ru@TiO<sub>2</sub>.

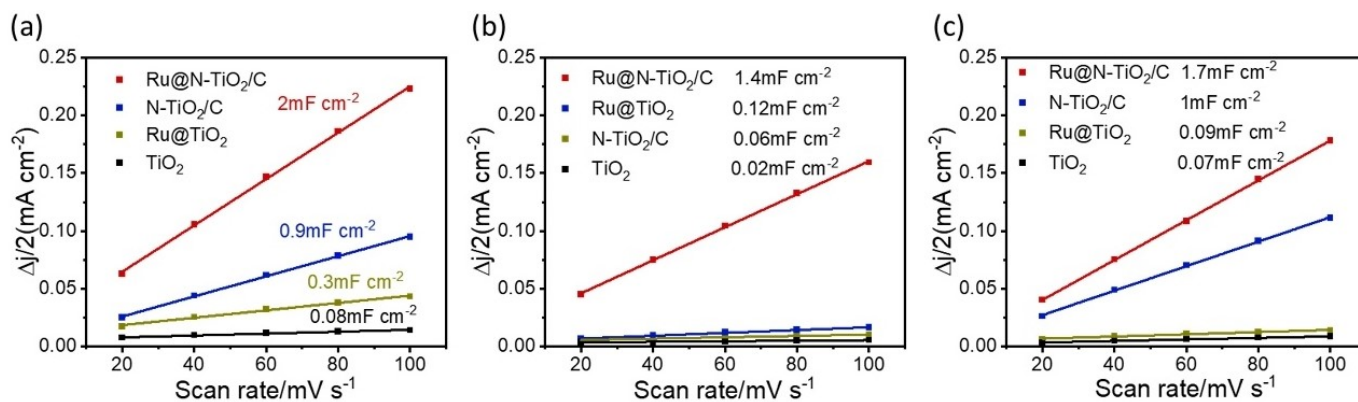

**Fig. S10.** Capacitive  $\Delta j/2$  as a function of the scan rate for Ru@N-TiO<sub>2</sub>/C nanospheres in (a) 1.0 M KOH, (b) 1.0 M PBS and (c) 0.5 M H<sub>2</sub>SO<sub>4</sub>.

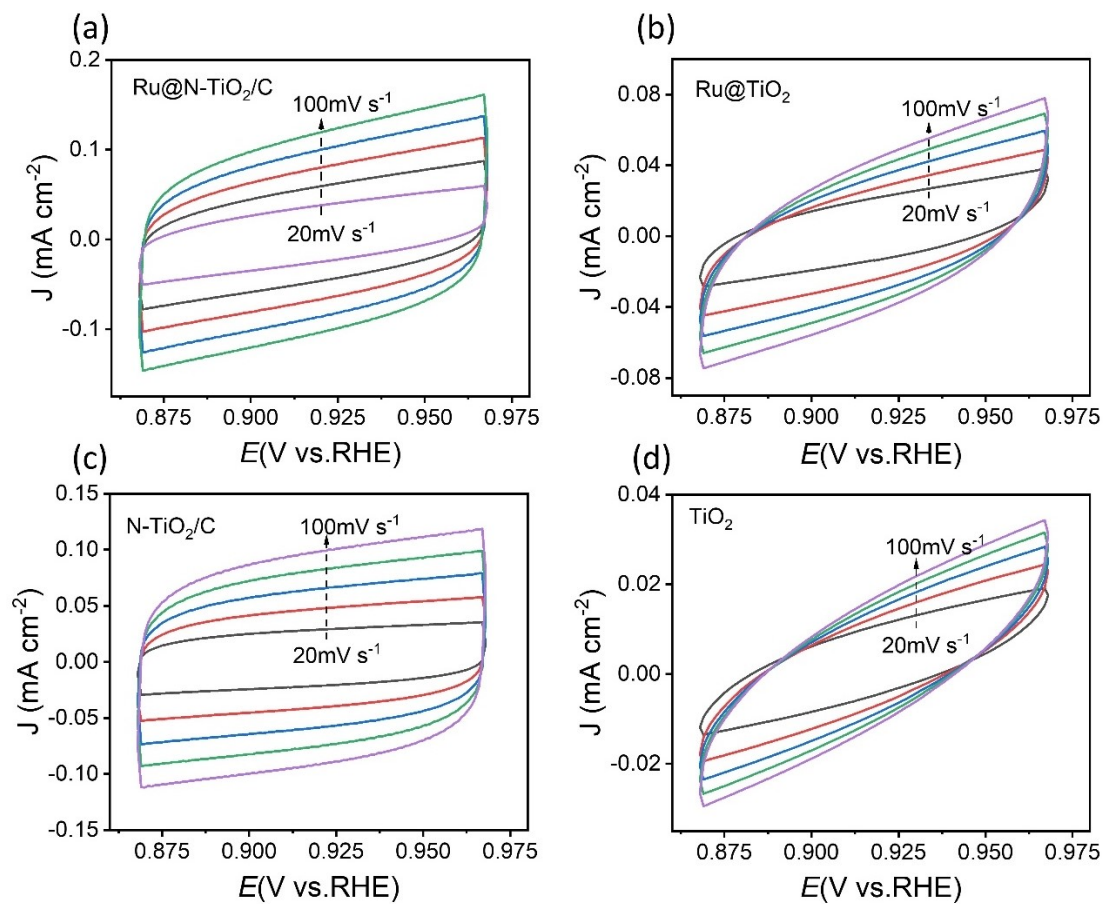

**Fig. S11.** Cyclic voltammetry curves of (a) Ru@N-TiO<sub>2</sub>/C, (b) Ru@TiO<sub>2</sub>, (c) N-TiO<sub>2</sub>/C and (d) TiO<sub>2</sub>, respectively. The arrow indicates the scan rate from 20 to 100 mV s<sup>-1</sup>.

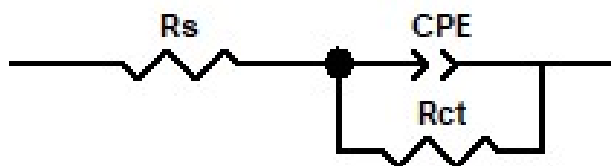

**Fig. S12.** Equivalent circuit model.  $R_{ct}$  and CPE represent the solution resistance, the charge transfer resistance and constant phase element, respectively.

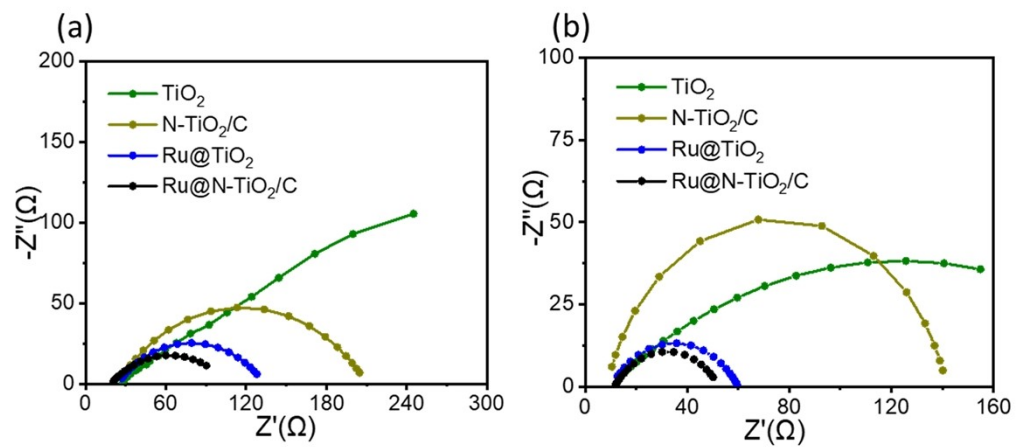

**Fig. S13.** Nyquist plots of  $\text{Ru@N-TiO}_2/\text{C}$ ,  $\text{N-TiO}_2/\text{C}$ ,  $\text{Ru@TiO}_2$ , and  $\text{TiO}_2$  in (a) 1.0 M PBS and (b) 0.5M  $\text{H}_2\text{SO}_4$ .

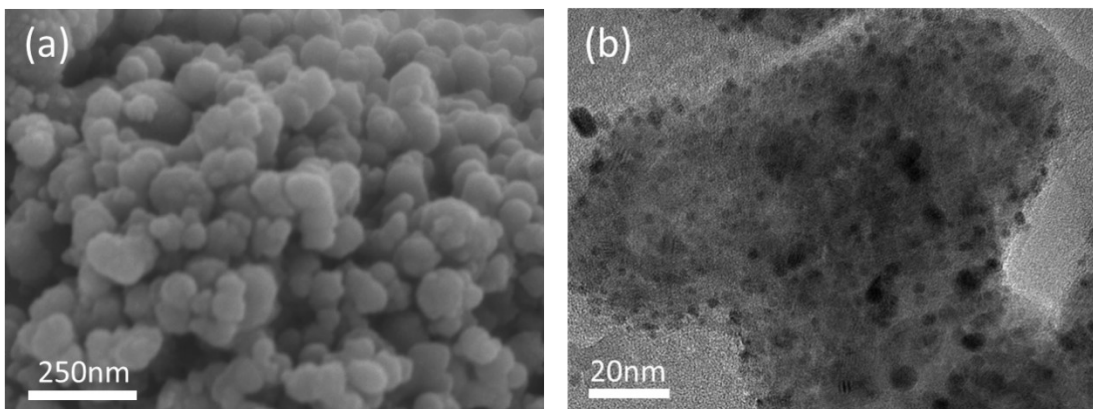

**Fig. S14.** (a) SEM and (b) TEM images of Ru@N-TiO<sub>2</sub>/C nanospheres after the 1000th cycling in 1M KOH.

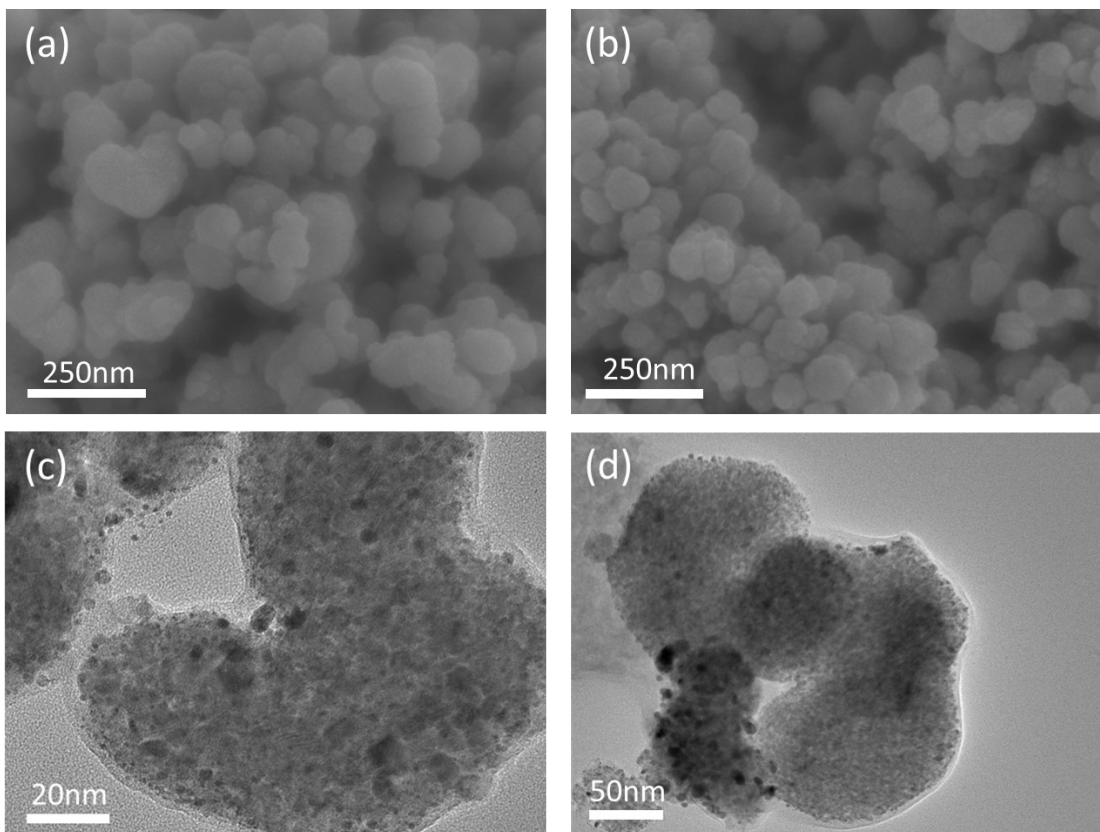

**Fig. S15.** (a) SEM, (c) TEM and (b) SEM, (d) TEM images of Ru@N-TiO<sub>2</sub>/C nanospheres after the 1000th cycling in 1M PBS and 0.5M H<sub>2</sub>SO<sub>4</sub>, respectively.

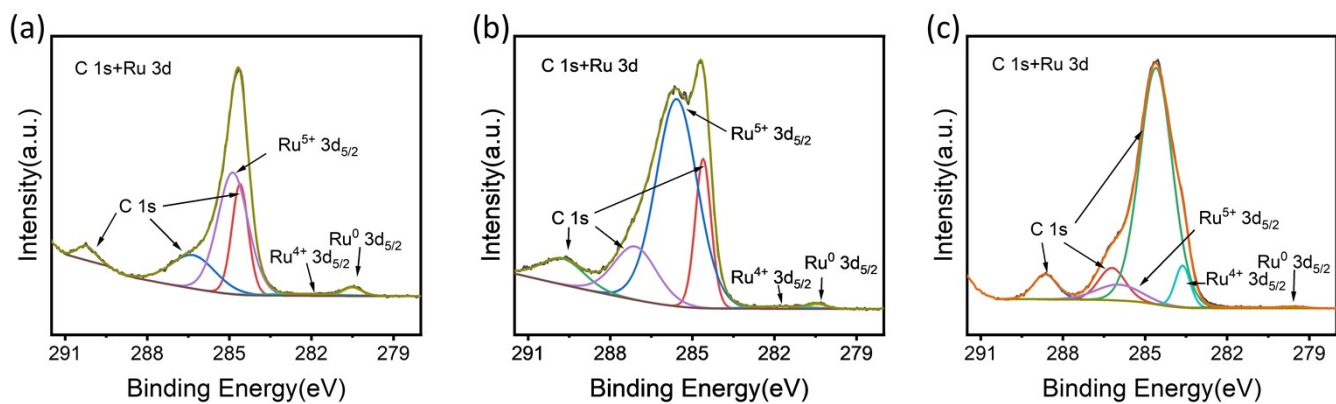

**Fig. S16.** High-resolution Ru 3d XPS spectra of Ru@N-TiO<sub>2</sub>/C after stability test in (a) 1M KOH, (b) 1M PBS and (c) 0.5M H<sub>2</sub>SO<sub>4</sub>.



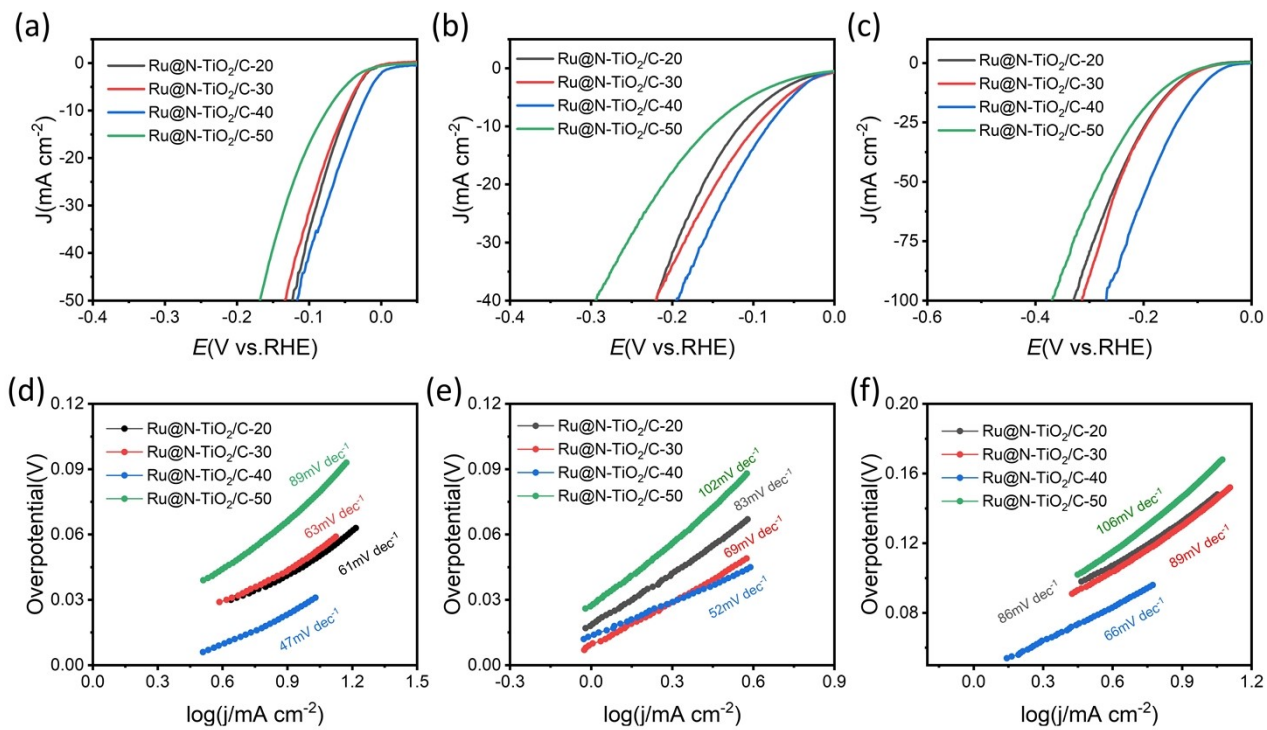

**Fig. S17.** LSV and Tafel plots of different loading mass Ru on Ru@N-TiO<sub>2</sub>/C composites in (a) 1M KOH, (b) 1M PBS and (c) 0.5M H<sub>2</sub>SO<sub>4</sub>.

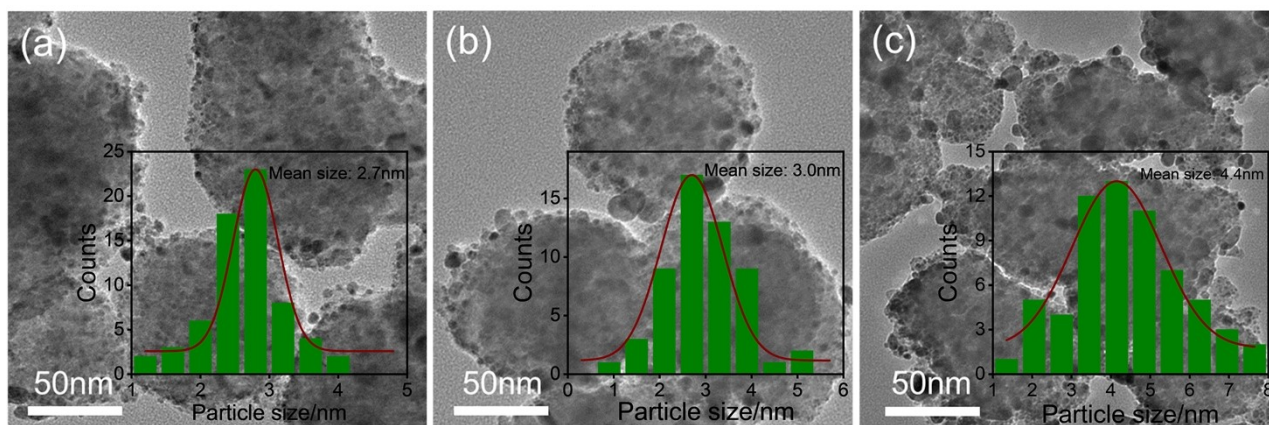

**Fig. S18.** TEM of different loading mass (a) Ru@N-TiO<sub>2</sub>/C-20, (b) Ru@N-TiO<sub>2</sub>/C-30 and (c) Ru@N-TiO<sub>2</sub>/C-50. Inset: the corresponding size distribution of Ru.

**Table S1.** Summary of the recently reported HER catalysts in 1M KOH, 1.0 M PBS and 0.5 M H<sub>2</sub>SO<sub>4</sub>.

| Catalyst                                                  | $\eta$ (at 10mA cm <sup>-2</sup> ) | Electrolyte solution                 | Reference |
|-----------------------------------------------------------|------------------------------------|--------------------------------------|-----------|
| Ru/Ni <sub>2</sub> P@NPC                                  | 124                                | 1.0 M KOH                            | 1         |
|                                                           | 132                                | 1.0 M PBS                            |           |
|                                                           | 89                                 | 0.5 M H <sub>2</sub> SO <sub>4</sub> |           |
| MoP-Ru <sub>2</sub> P/NPC                                 | 47                                 | 1.0 M KOH                            | 2         |
|                                                           | 126                                | 1.0 M PBS                            |           |
|                                                           | 82                                 | 0.5 M H <sub>2</sub> SO <sub>4</sub> |           |
| RuP <sub>x</sub> @NPC                                     | 74                                 | 1.0 M KOH                            | 3         |
|                                                           | 110                                | 1.0 M PBS                            |           |
|                                                           | 51                                 | 0.5 M H <sub>2</sub> SO <sub>4</sub> |           |
| CoP@BCN                                                   | 215                                | 1.0 M KOH                            | 4         |
|                                                           | 122                                | 1.0 M PBS                            |           |
|                                                           | 87                                 | 0.5 M H <sub>2</sub> SO <sub>4</sub> |           |
| Rh <sub>50</sub> Ru <sub>50</sub> @UiO-66-NH <sub>2</sub> | 177                                | 1.0 M KOH                            | 5         |
|                                                           | 114                                | 1.0 M PBS                            |           |
|                                                           | 77                                 | 0.5 M H <sub>2</sub> SO <sub>4</sub> |           |
| CoRu@NG-3                                                 | 62                                 | 1.0 M KOH                            | 6         |
|                                                           | 88                                 | 1.0 M PBS                            |           |
|                                                           | 52                                 | 0.5 M H <sub>2</sub> SO <sub>4</sub> |           |
| Ru@WNO-C                                                  | 24                                 | 1.0 M KOH                            | 7         |
|                                                           | 358                                | 1.0 M PBS                            |           |
|                                                           | 172                                | 0.5 M H <sub>2</sub> SO <sub>4</sub> |           |

|                          |     |                                      |           |
|--------------------------|-----|--------------------------------------|-----------|
|                          | 84  | 1.0 M KOH                            |           |
| Ni <sub>2</sub> P@NC/NF  | 155 | 1.0 M PBS                            | 8         |
|                          | 68  | 0.5 M H <sub>2</sub> SO <sub>4</sub> |           |
|                          | 94  | 1.0 M KOH                            |           |
| W/BrN                    | 190 | 1.0 M PBS                            | 9         |
|                          | 148 | 0.5 M H <sub>2</sub> SO <sub>4</sub> |           |
|                          | 39  | 1.0 M KOH                            |           |
| Ru@N-TiO <sub>2</sub> /C | 86  | 1.0 M PBS                            | This work |
|                          | 116 | 0.5 M H <sub>2</sub> SO <sub>4</sub> |           |

**Table S2.** Elemental values of simulated equivalent circuit for Ru@N-TiO<sub>2</sub>/C, Ru@TiO<sub>2</sub>, N-TiO<sub>2</sub>/C and TiO<sub>2</sub> in alkaline, neutral, and acidic media.

|                          | 1M KOH             |                     | 1M PBS             |                     | 0.5M H <sub>2</sub> SO <sub>4</sub> |                     |
|--------------------------|--------------------|---------------------|--------------------|---------------------|-------------------------------------|---------------------|
|                          | R <sub>s</sub> (Ω) | R <sub>ct</sub> (Ω) | R <sub>s</sub> (Ω) | R <sub>ct</sub> (Ω) | R <sub>s</sub> (Ω)                  | R <sub>ct</sub> (Ω) |
| Ru@N-TiO <sub>2</sub> /C | 10.45              | 52.41               | 19.11              | 87.15               | 11.52                               | 40.97               |
| Ru@TiO <sub>2</sub>      | 5.579              | 163.9               | 27.96              | 160.3               | 10.23                               | 49.75               |
| N-TiO <sub>2</sub> /C    | 8.958              | 194.8               | 23.84              | 186.2               | 8.284                               | 138.4               |
| TiO <sub>2</sub>         | 8.034              | 420.1               | 23.54              | 1092                | 9.278                               | 229.1               |

## References

1. J.-Q. Chi, X.-Y. Zhang, X. Ma, B. Dong, J.-Q. Zhang, B.-Y. Guo, M. Yang, L. Wang, Y.-M. Chai and C. Liu, *ACS Sustain. Chem. Eng.*, 2019, **7**, 17714-17722.
2. Y. Gao, Z. Chen, Y. Zhao, W. Yu, X. Jiang, M. He, Z. Li, T. Ma, Z. Wu and L. Wang, *Appl. Catal. B Environ.*, 2022, **303**, 120879.
3. J.-Q. Chi, W.-K. Gao, J.-H. Lin, B. Dong, K.-L. Yan, J.-F. Qin, B. Liu, Y.-M. Chai and C.-G. Liu, *ChemSusChem*, 2018, **11**, 743-752.
4. H. Tabassum, W. Guo, W. Meng, A. Mahmood, R. Zhao, Q. Wang and R. Zou, *Adv. Energy Mater.*, 2017, **7**, 1601671.
5. Z. Ding, K. Wang, Z. Mai, G. He, Z. Liu and Z. Tang, *Int. J. Hydrogen Energy*, 2019, **44**, 24680-24689.
6. H. Wang, M. Zhou, X. Bo and L. Guo, *Electrochim. Acta*, 2021, **382**, 138337.
7. G. Meng, H. Tian, L. Peng, Z. Ma, Y. Chen, C. Chen, Z. Chang, X. Cui and J. Shi, *Nano Energy*, 2021, **80**, 105531.
8. X.-W. Lv, Z.-P. Hu, L. Chen, J.-T. Ren, Y.-P. Liu and Z.-Y. Yuan, *ACS Sustain. Chem. Eng.*, 2019, **7**, 12770-12778.
9. Q. Li, C. Han, X. Ma, D. Wang, Z. Xing and X. Yang, *J. Mater. Chem. A*, 2017, **5**, 17856-17861.
